# Supplementary material
Source: publisher site journal article supplement (https://www.dovepress.com/article/362459)
Supplement: Supplementary file 1 [file get_supplementary_file.php]

**Supplementary material**

**Data collection Form**

**Survey information**

| Participant Id Number |  |  |  |
| --- | --- | --- | --- |
| Consent has been read and obtained | If no stop | 1. Yes 2. NO |  |
| Interview Language |  | 1. Amharic 2. Other |  |
| Time of interview |  |  |  |
| Contact phone number where possible |  |  |  |

**Demographic Information**

| Questions |  |  |
| --- | --- | --- |
| Sex | 1. Male 2. Female |  |
| How old are you? Years |  |  |
| In total, how many years have you spent at school or  in full-time study (excluding pre-school)? |  |  |
| What is the highest level of education you have? | 1. No formal schooling 2. Less than primary school 3. Primary school completed 4. Secondary school completed 5. High school completed 6. College/University completed 7. Post graduate degree |  |
| What is your ethnic group background? | 1. Amhara 2. Oromo 3. Tigre 4. SNNPE? 5. Other |  |
| What is your marital status? | 1. Never married 2. Currently married 3. Separated 4. Divorced 5. Widowed 6. Cohabitating |  |
| Taking the past year, can you tell me what the average earnings of the household have been? (per month in Birr) |  |  |

**HIV /ART related questions**

| Years since diagnosis |  |  |
| --- | --- | --- |
| Years since start of HARRT |  |  |
| CD4 count (current) |  |  |
| Viral load (current) |  |  |
| Current HAART regimen  (if other specify) | 1. TDF+3TC+EFV 2. TDF+3TC+ NVP 3. AZT+3TC+EFV 4. AZT+3TC+NVP 5. TDF+3TC+PI(kaletra) 6. AZT+3TC+PI(kaletra) 7. Others |  |
| Previous ART regimen  (if other specify) | 1. TDF+3TC+EFV 2. TDF+3TC+ NVP 3. AZT+3TC+EFV 4. AZT+3TC+NVP 5. TDF+3TC+PI(kaletra) 6. AZT+3TC+PI(kaletra) 7. Others |  |

**Behavioral Measurements**

| Now I am going to ask you some questions about various health behaviors. This includes things like smoking, drinking alcohol, eating fruits  and vegetables and physical activity. Let's start with tobacco. | | | | |
| --- | --- | --- | --- | --- |
| **Tobacco Use** | | | | |
| Do you ever smoke any tobacco products, such  as cigarettes, cigars or pipes? | 1. Yes 2. No | |  | |
| Do you currently smoke any tobacco products, such  as cigarettes, cigars or pipes? | 1. Yes 2. No | |  | |
| How long do you smoke (in years ) |  | |  | |
| On average, how many of the following do you smoke each day? | 1. Manufactured cigarettes   └─┴─┘   1. Hand-rolled cigarettes   └─┴─┘   1. Pipes full of tobacco   └─┴─┘   1. Cigars, cheroots, cigarillos   └─┴─┘   1. If Other specify   └─┴─┘ | |  | |
| If you stop smoking , How long a go did you stop smoking daily?(in years) |  | |  | |
| During the past 7 days, on how many days did  someone smoke in closed areas in your workplace (in  the building, in a work area or a specific office) when  you were present? |  | |  | |
| During the past 7 days, on how many days did  Someone in your home smoke when you were  present? |  | |  | |
| **Alcohol Consumption**  The next questions ask about the consumption of alcohol | | | | |
| Have you ever consumed an alcoholic drink such as  beer, wine, spirits, fermented cider? | 1. Yes 2. No | | |  |
| Have you consumed an alcoholic drink within the past 12 months? | 1. Yes 2. No | | |  |
| During the past 12 months, how frequently have you had at least one alcoholic drink? | 1. Daily 2. 5-6 days per week 3. 1-4 days per week 4. 1-3 days per month 5. Less than once a month | | |  |
| Have you consumed an alcoholic drink within the past  30 days? |  | | |  |
| During the past 30 days, on how many occasions did  you have at least one alcoholic drink? |  | | |  |
| During the past 30 days, when you drank alcohol, on  average, how many standard alcoholic drinks did  you have during one drinking occasion? |  | | |  |
| During the past 30 days, what was the largest number  of standard alcoholic drinks you had on a single  occasion, counting all types of alcoholic drinks  together? |  | | |  |
| During the past 30 days, how many times did you have for **men: five or more**  for **women: four or more**  Standard alcoholic drinks in a single drinking occasion? |  | | |  |
| **Diet**  The next questions ask about the fruits and vegetables that you usually eat. I have a nutrition card here that shows you some examples of local fruits and vegetables. Each picture represents the size of a serving. As you answer these questions please think of a typical week in the last year. | | | | |
| In a typical week, on how many days do you eat fruit? |  | | |  |
| How many servings of fruit do you eat on one of those  days? |  | | |  |
| In a typical week, on how many days do you  eat vegetables? |  | | |  |
| How many servings of vegetables do you eat on one of  those days? |  | | |  |
| What type of oil or fat is most often used for meal  preparation in your household? | 1. Vegetable oil 2. Lard or suet 3. Butter or ghee 4. Margarine 5. Other 6. None in particular 7. None used 8. Don’t know | | |  |
| On average, how many meals per week do you eat that  were not prepared at a home? By meal, I mean  breakfast, lunch and dinner |  | | |  |
| **Physical Activity**  Next I am going to ask you about the time you spend doing different types of physical activity in a typical week. Please answer these questions even if you do not consider yourself to be a physically active person. Think first about the time you spend doing work. Think of work as the things that you have to do such as paid or unpaid work, study/training, household chores, harvesting food/crops, fishing or hunting for food, seeking employment. In answering the following questions 'vigorous-intensity activities' are activities that require hard physical effort and cause large increases in breathing or heart rate, 'moderate-intensity activities' are activities that require moderate physical effort and cause small increases in breathing or heart rate. | | | | |
| Does your work involve vigorous-intensity activity that  causes large increases in breathing or heart rate like  [carrying or lifting heavy loads, digging or construction  work] for at least 10 minutes continuously? | |  | |  |
| In a typical week, on how many days do you do  vigorous-intensity activities as part of your work? | |  | |  |
| How much time do you spend doing vigorous-intensity  activities at work on a typical day? | |  | |  |
| Does your work involve moderate-intensity activity, that  causes small increases in breathing or heart rate such  as brisk walking[or carrying light loads]for at least 10  minutes continuously? | |  | |  |
| In a typical week, on how many days do you do  moderate-intensity activities as part of your work? | |  | |  |
| How much time do you spend doing moderate-intensity  activities at work on a typical day? | |  | |  |
| Do you do any vigorous-intensity sports, fitness or  recreational (leisure)activities that cause large  increases in breathing or heart rate like [running or  football] for at least 10 minutes continuously? | | 1. Yes 2. No | |  |
| In a typical week, on how many days do you do  vigorous-intensity sports, fitness or recreational  (leisure)activities? | | No of days | |  |
| How much time do you spend doing vigorous-intensity  sports, fitness or recreational activities on a typical day? | | Hrs | |  |
| Do you do any moderate-intensity sports, fitness or  recreational (leisure)activities that cause a small  increase in breathing or heart rate such as brisk  walking, [cycling, swimming, volleyball] for at least 10  minutes continuously? | | 1. Yes 2. No | |  |
| In a typical week, on how many days do you do  moderate-intensity sports, fitness or recreational  (leisure)activities? | | No of days | |  |
| How much time do you spend doing moderate-intensity  sports, fitness or recreational(leisure) activities on a  typical day? | |  | |  |
| How much time do you usually spend sitting or reclining on a typical day? | |  | |  |
| **History of Raised Blood Pressure** | | | | |
| Have you ever had your blood pressure measured by a  doctor or other health worker? | | 1. Yes 2. No | |  |
| Have you ever been told by a doctor or other health  worker that you have raised blood pressure or  hypertension? | | 1. Yes 2. No | |  |
| Have you been told in the past 12 months? | | 1. Yes 2. No | |  |
| Are you currently receiving any of the following treatments/advice for high blood pressure prescribed by a doctor or other health worker?  Drugs (medication) that you have taken in the past two  Weeks  Advice to reduce salt intake?  Advice or treatment to lose weight?  Advice or treatment to stop smoking?  Advice to start or do more exercise? | | 1. Yes 2. No | |  |
| Have you ever seen a traditional healer for raised blood  pressure or hypertension? | |  | |  |
| Are you currently taking any herbal or traditional  remedy for your raised blood pressure? | |  | |  |
| **History of Diabetes** | | | | |
| Have you ever had your blood sugar measured by a  doctor or other health worker? | |  | |  |
| Have you ever been told by a doctor or other health  worker that you have raised blood sugar or diabetes? | |  | |  |
| Have you been told in the past 12 months? | |  | |  |
| Are you currently receiving any of the following treatments/advice for diabetes prescribed by a doctor or other health worker? | | | | |
| Insulin  Drugs (medication) that you have taken in the past two  Weeks?  Special prescribed diet  Advice or treatment to lose weight  Advice or treatment to stop smoking  Advice to start or do more exercise | |  | |  |
| Have you ever seen a traditional healer for diabetes or  raised blood sugar? | |  | |  |
| Are you currently taking any herbal or traditional  remedy for your diabetes? | |  | |  |
|  | |  | |  |

Step 2 Physical Measurements

| Height and Weight | | |
| --- | --- | --- |
| Height | In cm |  |
| Weight | In kg |  |
| BMI |  |  |
| Hip circumference |  |  |
| Waist circumference | In cm |  |
| Blood Pressure | Reading 1  Reading 2 |  |

Step 3 Biochemical tests

|  |  |
| --- | --- |
| During the past 12 hours have you had anything to eat  or drink, other than water? | 1. Yes 2. No |
| FBS |  |
| Blood Lipids | |
| Total cholesterol |  |
| During the past two weeks, have you been treated for raised cholesterol with drugs (medication) prescribed by a doctor or other health worker? | 1. Yes 2. No |
| Triglycerides mmol/l or mg/dl |  |
| HDL Cholesterol mmol/l or mg/dl |  |
| LDL cholesterol mmol/l or mg/dl (calculated) |  |

**Notes:** Adapted from WHO STEPS Instrument (Core and Expanded). The WHO STEPwise approach to noncommunicable disease risk factor surveillance (STEPS). Geneva; Switzerland; World Health Organization; 2016.20
